# Supplementary material for: Within-lifetime trade-offs but evolutionary freedom for hormonal and immunological traits: evidence from mice bred for high voluntary exercise
Source: Oxford University Press journal article supplement (doi:10.1242/jeb.066167), 2012-04-25
Supplement: jeb066167tables1-s2.pdf [file jeb066167tables1-s2.pdf]

Table S1. Summary of response variables for the LPS experiment

| Response variable                 | N   | Effect                      | d.f. (Num, Den) | F      | P          |
|-----------------------------------|-----|-----------------------------|-----------------|--------|------------|
| Sickness behaviour                | 136 | Innate treatment            | 2, 12           | 47.31  | <0.001     |
|                                   |     | Linetype                    | 1, 6            | 3.23   | 0.122      |
|                                   |     | Innate treatment x linetype | 2, 12           | 0.40   | 0.682      |
|                                   |     | Mini                        | 1, 106          | 14.62  | <0.001 (+) |
| log (Initial mass)                | 136 | Innate treatment            | 2, 12           | 0.36   | 0.707      |
|                                   |     | Linetype                    | 1, 6            | 1.49   | 0.268      |
|                                   |     | Innate treatment x linetype | 2, 12           | 1.89   | 0.194      |
|                                   |     | Mini                        | 1, 106          | 1.11   | 0.294 (-)  |
| log (Final mass)                  | 136 | Innate treatment            | 2, 12           | 13.68  | <0.001     |
|                                   |     | Linetype                    | 1, 6            | 0.61   | 0.465      |
|                                   |     | Innate treatment x linetype | 2, 12           | 0.32   | 0.730      |
|                                   |     | Mini                        | 1, 106          | 1.10   | 0.298 (-)  |
| Change in mass                    | 136 | Innate treatment            | 2, 12           | 48.74  | <0.001     |
|                                   |     | Linetype                    | 1, 6            | 5.33   | 0.060      |
|                                   |     | Innate treatment x linetype | 2, 12           | 3.22   | 0.076      |
|                                   |     | Mini                        | 1, 106          | 1.24   | 0.268 (-)  |
| Change in haematocrit             | 136 | Innate treatment            | 2, 12           | 26.84  | <0.001     |
|                                   |     | Linetype                    | 1, 6            | 1.76   | 0.233      |
|                                   |     | Innate treatment x linetype | 2, 12           | 0.07   | 0.932      |
|                                   |     | Mini                        | 1, 106          | 2.01   | 0.159 (+)  |
| Haematocrit – 2 h after injection | 136 | Innate treatment            | 2, 12           | 35.05  | <0.001     |
|                                   |     | Linetype                    | 1, 6            | 0.06   | 0.812      |
|                                   |     | Innate treatment x linetype | 2, 12           | 1.11   | 0.361      |
|                                   |     | mini                        | 1, 106          | 0.79   | 0.375 (-)  |
| Hematocrit – after wheels         | 136 | Innate treatment            | 2, 12           | 0.74   | 0.497      |
|                                   |     | Linetype                    | 1, 6            | 0.23   | 0.648      |
|                                   |     | Innate treatment x linetype | 2, 12           | 0.57   | 0.581      |
|                                   |     | Mini                        | 1, 106          | 2.17   | 0.144 (+)  |
| log (Dry liver mass)              | 136 | Innate treatment            | 2, 12           | 22.24  | <0.001     |
|                                   |     | Linetype                    | 1, 6            | 0.85   | 0.391      |
|                                   |     | Innate treatment x linetype | 2, 12           | 0.74   | 0.497      |
|                                   |     | Log (final body mass)       | 1, 105          | 208.20 | <0.001 (+) |
|                                   |     | Mini                        | 1, 105          | 13.12  | <0.001 (+) |
| log (Wet spleen mass)             | 136 | Innate treatment            | 2, 12           | 117.6  | <0.001     |
|                                   |     | Linetype                    | 1, 6            | 0.35   | 0.576      |
|                                   |     | Innate treatment x linetype | 2, 12           | 2.89   | 0.094      |
|                                   |     | Log (final body mass)       | 1, 105          | 58.80  | <0.001 (+) |
|                                   |     | Mini                        | 1, 105          | 8.14   | 0.005 (+)  |
| Rank TNF- $\alpha$                | 134 | Innate treatment            | 2, 12           | 170.33 | <0.001     |
|                                   |     | Linetype                    | 1, 6            | 1.51   | 0.265      |
|                                   |     | Innate treatment x linetype | 2, 12           | 0.23   | 0.799      |
|                                   |     | Mini                        | 1, 104          | 0.57   | 0.452 (+)  |
| Rank GM-CSF                       | 134 | Innate treatment            | 2, 12           | 74.97  | <0.001     |
|                                   |     | Linetype                    | 1, 6            | 0.17   | 0.693      |
|                                   |     | Innate treatment x linetype | 2, 12           | 0.31   | 0.742      |
|                                   |     | Mini                        | 1, 104          | 0.10   | 0.754 (+)  |
| Rank IL-1 $\beta$                 | 134 | Innate treatment            | 2, 12           | 99.03  | <0.001     |
|                                   |     | Linetype                    | 1, 6            | 1.10   | 0.335      |
|                                   |     | Innate treatment x linetype | 2, 12           | 0.35   | 0.710      |
|                                   |     | Mini                        | 1, 104          | 1.45   | 0.231 (-)  |
| Rank IL-6                         | 134 | Innate treatment            | 2, 12           | 301.36 | <0.001     |
|                                   |     | Linetype                    | 1, 6            | 1.09   | 0.337      |
|                                   |     | Innate treatment x linetype | 2, 12           | 0.47   | 0.637      |
|                                   |     | Mini                        | 1, 104          | 0.87   | 0.353 (+)  |
| Day 1, Sqrt (distance run)        | 135 | Innate treatment            | 2, 12           | 91.21  | <0.001     |
|                                   |     | Linetype                    | 1, 6            | 17.76  | 0.006      |
|                                   |     | Innate treatment x linetype | 2, 12           | 2.91   | 0.093      |
|                                   |     | Mini                        | 1, 104          | 2.67   | 0.105 (+)  |
|                                   |     | Sqrt(freeness)              | 1, 104          | 1.19   | 0.279 (-)  |
| Day 2, Sqrt (distance run)        | 135 | Innate treatment            | 2, 12           | 21.26  | 0.001      |
|                                   |     | Linetype                    | 1, 6            | 21.71  | 0.004      |
|                                   |     | Innate treatment x linetype | 2, 12           | 0.01   | 0.989      |
|                                   |     | Mini                        | 1, 104          | 0.01   | 0.930 (+)  |
|                                   |     | Sqrt(freeness)              | 1, 104          | 1.55   | 0.216 (-)  |
| Day 1, Sqrt (running duration)    | 135 | Innate treatment            | 2, 12           | 159.94 | <0.001     |
|                                   |     | Linetype                    | 1, 6            | 5.31   | 0.061      |
|                                   |     | Innate treatment x linetype | 2, 12           | 4.87   | 0.028      |
|                                   |     | Mini                        | 1, 104          | 1.02   | 0.315 (+)  |
|                                   |     | Sqrt(freeness)              | 1, 104          | 0.01   | 0.923 (+)  |
| Day 2, Sqrt (running duration)    | 135 | Innate treatment            | 2, 12           | 30.70  | <0.001     |
|                                   |     | Linetype                    | 1, 6            | 2.95   | 0.137      |
|                                   |     | Innate treatment x linetype | 2, 12           | 0.26   | 0.774      |
|                                   |     | Mini                        | 1, 104          | 0.01   | 0.930 (+)  |
|                                   |     |                             |                 |        |            |

|                             |     |                             |               |             |                  |
|-----------------------------|-----|-----------------------------|---------------|-------------|------------------|
|                             |     | <b>Sqrt(freeness)</b>       | <b>1, 104</b> | <b>0.27</b> | <b>0.602 (-)</b> |
| Day 1,<br>Sqrt (mean speed) | 135 | Innate treatment            | 2, 12         | 20.89       | <0.001           |
|                             |     | Linetype                    | 1, 6          | 31.58       | 0.001            |
|                             |     | Innate treatment x linetype | 2, 12         | 0.66        | 0.536            |
|                             |     | Mini                        | 1, 104        | 2.90        | 0.092 (+)        |
|                             |     | <b>Sqrt(freeness)</b>       | <b>1, 104</b> | <b>4.87</b> | <b>0.030 (-)</b> |
| Day 2,<br>Sqrt (mean speed) | 135 | Innate treatment            | 2, 12         | 34.67       | <0.001           |
|                             |     | Linetype                    | 1, 6          | 36.21       | 0.001            |
|                             |     | Innate treatment x linetype | 2, 12         | 1.73        | 0.219            |
|                             |     | Mini                        | 1, 104        | 2.90        | 0.092 (+)        |
|                             |     | <b>Sqrt(freeness)</b>       | <b>1, 104</b> | <b>3.25</b> | <b>0.075 (-)</b> |
| Day 1,<br>Maximum speed     | 135 | Innate treatment            | 2, 12         | 7.81        | 0.007            |
|                             |     | Linetype                    | 1, 6          | 21.69       | 0.004            |
|                             |     | Innate treatment x linetype | 2, 12         | 1.88        | 0.195            |
|                             |     | Mini                        | 1, 104        | 1.39        | 0.241 (+)        |
|                             |     | <b>Sqrt(freeness)</b>       | <b>1, 104</b> | <b>0.03</b> | <b>0.854 (-)</b> |
| Day 2,<br>Maximum speed     | 135 | Innate treatment            | 2, 12         | 4.40        | 0.037            |
|                             |     | Linetype                    | 1, 6          | 36.21       | <0.001           |
|                             |     | Innate treatment x linetype | 2, 12         | 0.16        | 0.853            |
|                             |     | Mini                        | 1, 104        | 0.09        | 0.767 (+)        |
|                             |     | <b>Sqrt(freeness)</b>       | <b>1, 104</b> | <b>2.00</b> | <b>0.161 (-)</b> |

Statistics were run in SAS using Proc Mixed. Fixed effects that are significant at  $\alpha=0.05$  are bold. log-transformed body mass was included as a covariate in the analyses for organ masses. Wheel freeness was included in analyses for wheel running variables. Sign after *P*-values for mini-muscle indicates direction of mini-muscles effect (e.g. + indicates that the mini-muscle mice have a higher mean than normal-muscle mice).

*N*, sample size; d.f., degrees of freedom; mini, dummy variable that indicates whether the mice have mini-muscle; sqrt, square-root transformed.

Table S2. Results from the analysis examining how rank-TNF $\alpha$  varied within each LPS treatment

| LPS treatment | <i>N</i> | Effect   | d.f. (Num, Den) | <i>F</i> | <i>P</i>  |
|---------------|----------|----------|-----------------|----------|-----------|
| LPS           | 45       | Linetype | 1,6             | 1.26     | 0.304     |
|               |          | Mini     | 1,31            | 0.11     | 0.742 (-) |
| Sham          | 44       | Linetype | 1,5             | 0.04     | 0.846     |
|               |          | Mini     | 1,31            | 3.00     | 0.093 (+) |
| Baseline      | 45       | Linetype | 1,6             | 1.01     | 0.353     |
|               |          | Mini     | 1,31            | 0.67     | 0.418 (-) |

Statistics were run in SAS using Proc Mixed. Sign after *P*-values for mini-muscle indicates direction of mini-muscle effect (e.g. + indicates that the mini-muscle mice have a higher mean than normal muscle mice).

*N*, sample size; d.f., degrees of freedom; mini, dummy variable that indicates whether the mice have mini-muscle.
