# Supplementary figures and images for: Within-lifetime trade-offs but evolutionary freedom for hormonal and immunological traits: evidence from mice bred for high voluntary exercise
Source: Oxford University Press journal article supplement (doi:10.1242/jeb.066167), 2012-04-25

Figure S1.

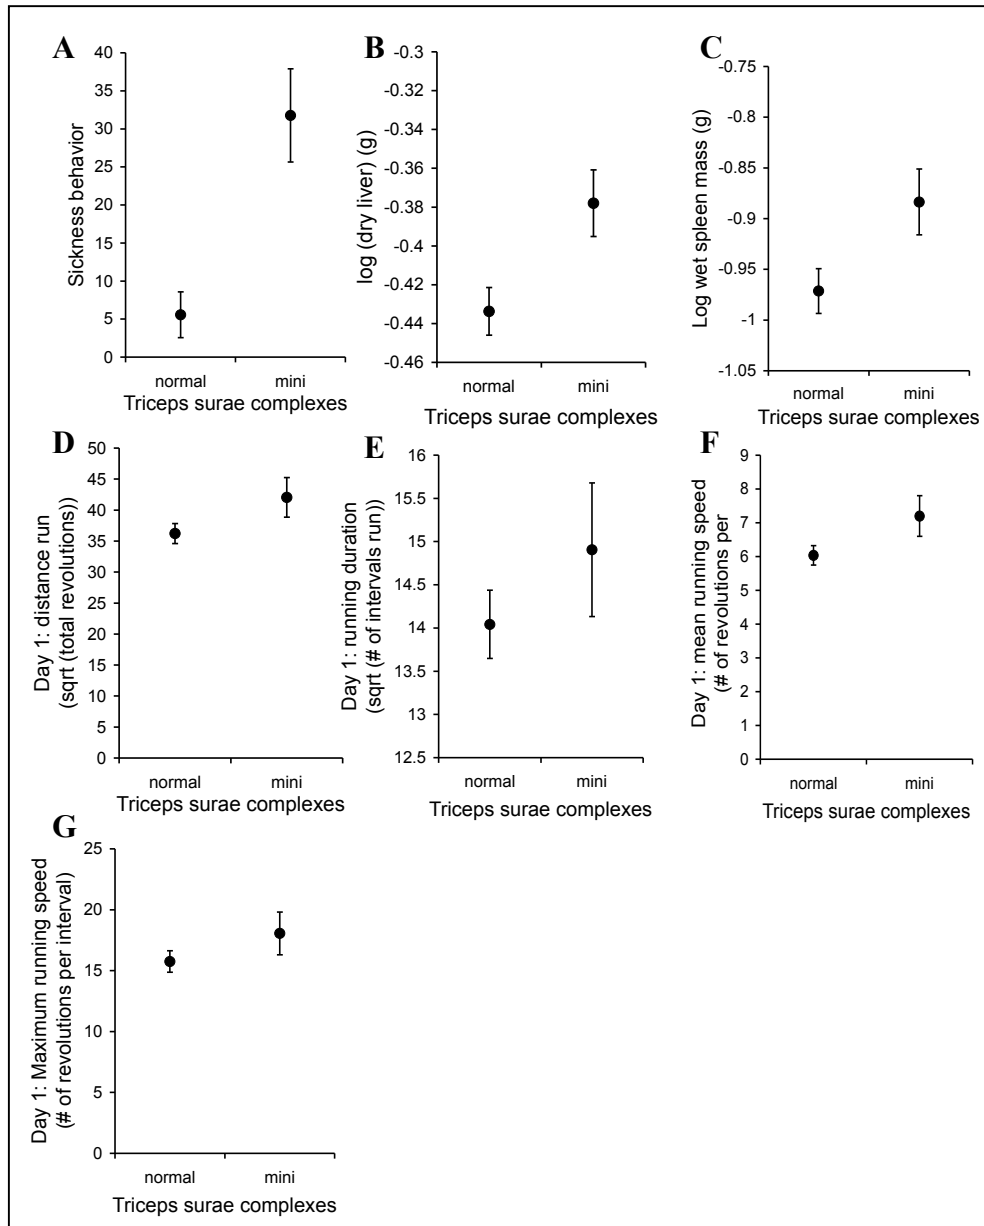

Supplement: jeb066167figs1.pdf [file jeb066167figs1.pdf]
